# Supplementary material for: A k-mer-based method for the identification of phenotype-associated genomic biomarkers and predicting phenotypes of sequenced bacteria
Source: PubMed Central journal article supplement (PMC6211763; doi:10.1371/journal.pcbi.1006434), 2018-10-22

The confusion matrices of different classification models.

Fig S3A. The confusion matrices of classification models on contigs (N  $k$ -mers = 1000)

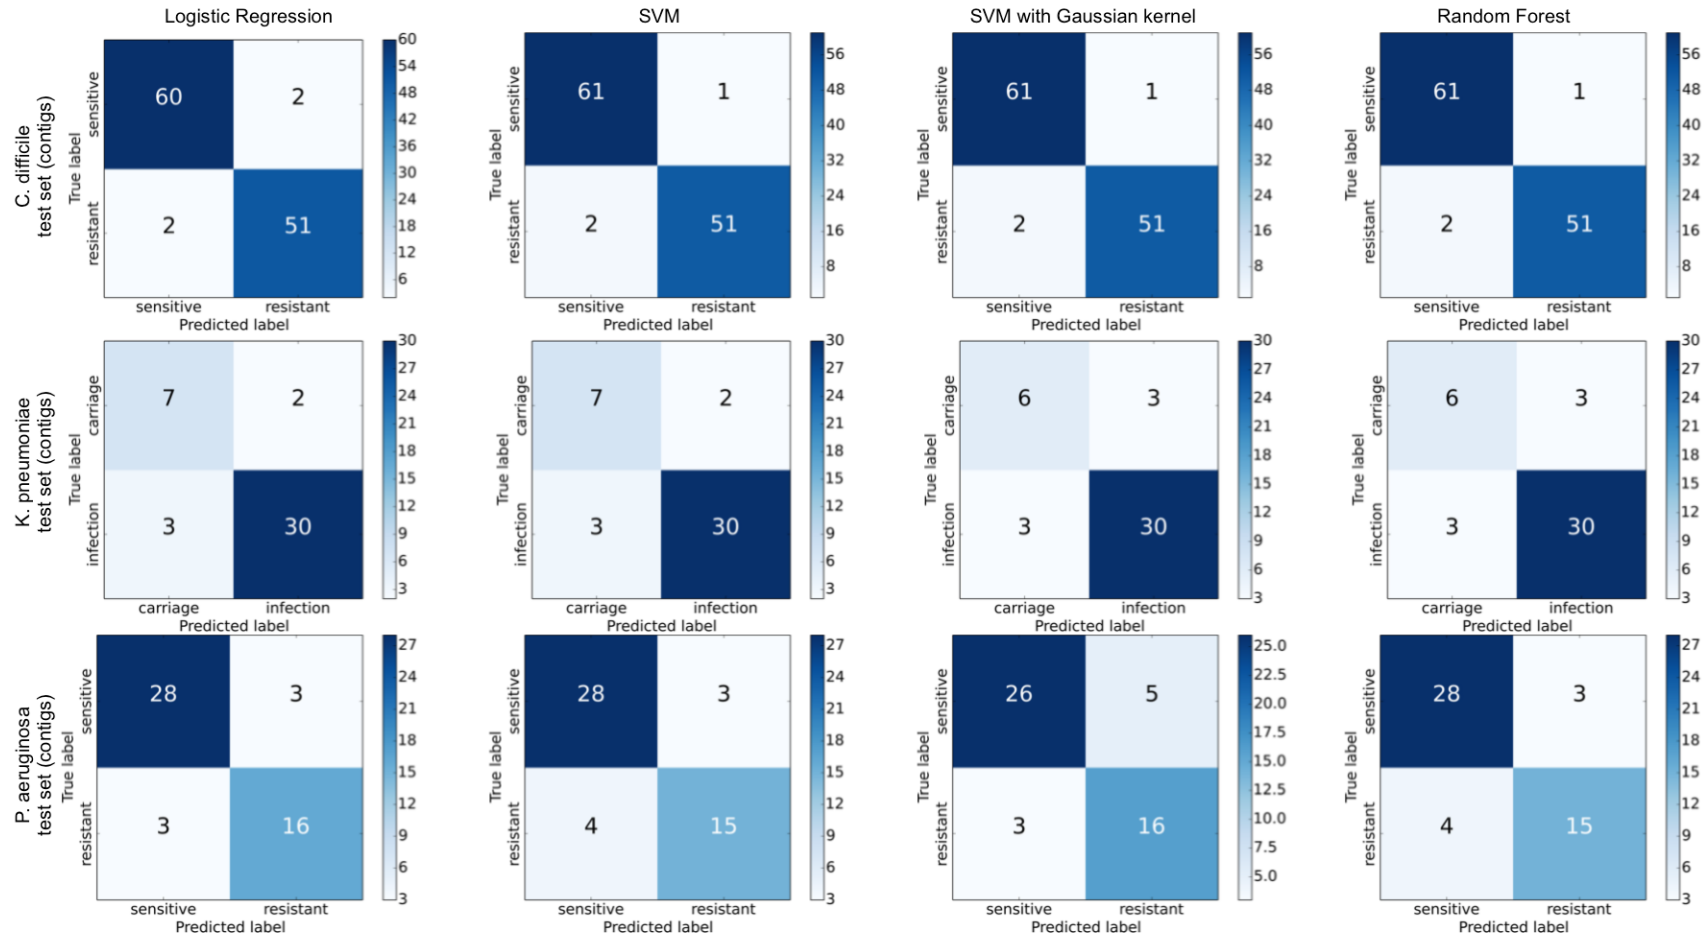

**Fig S3B. The confusion matrices of classification models on reads (N  $k$ -mers = 1000)**

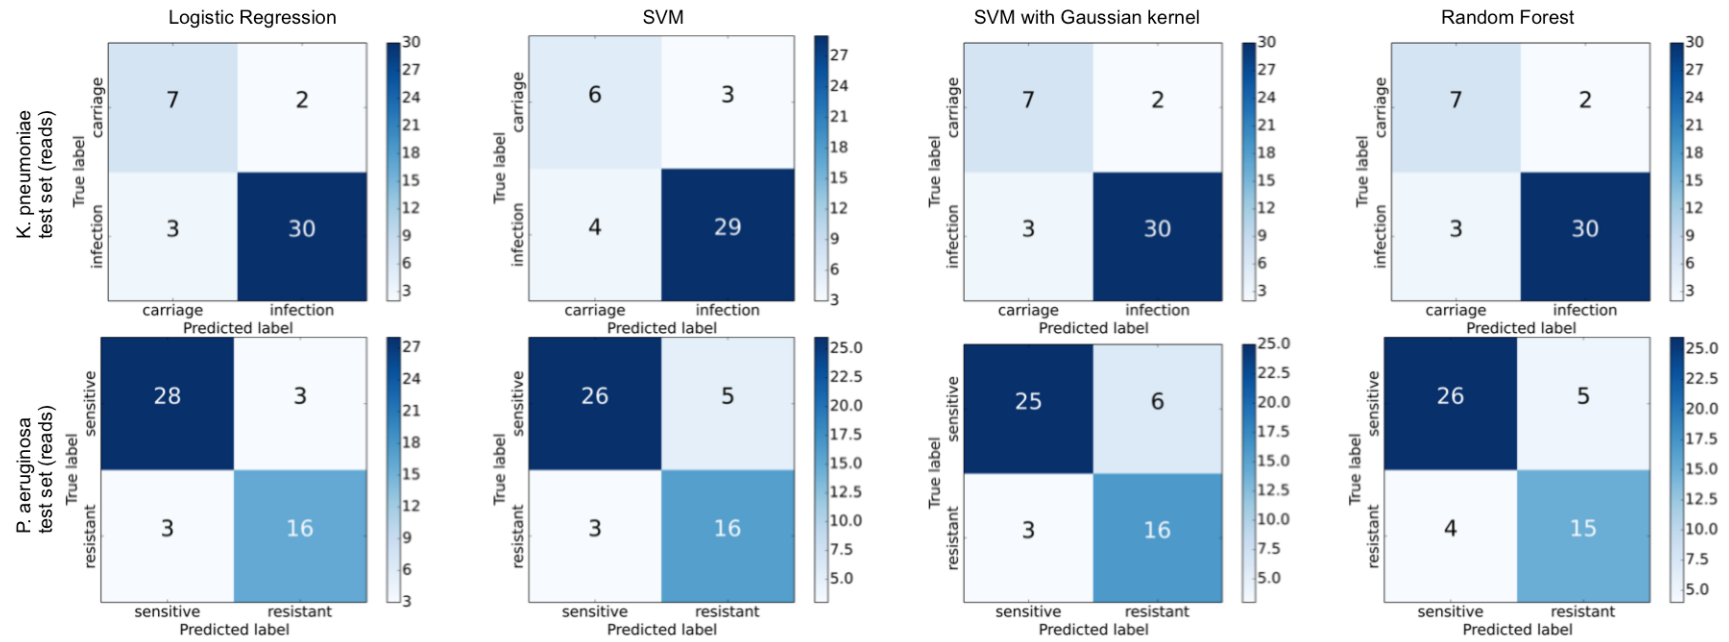

**Fig S3C. The confusion matrices of classification models on contigs (N *k*-mers = 10,000)**

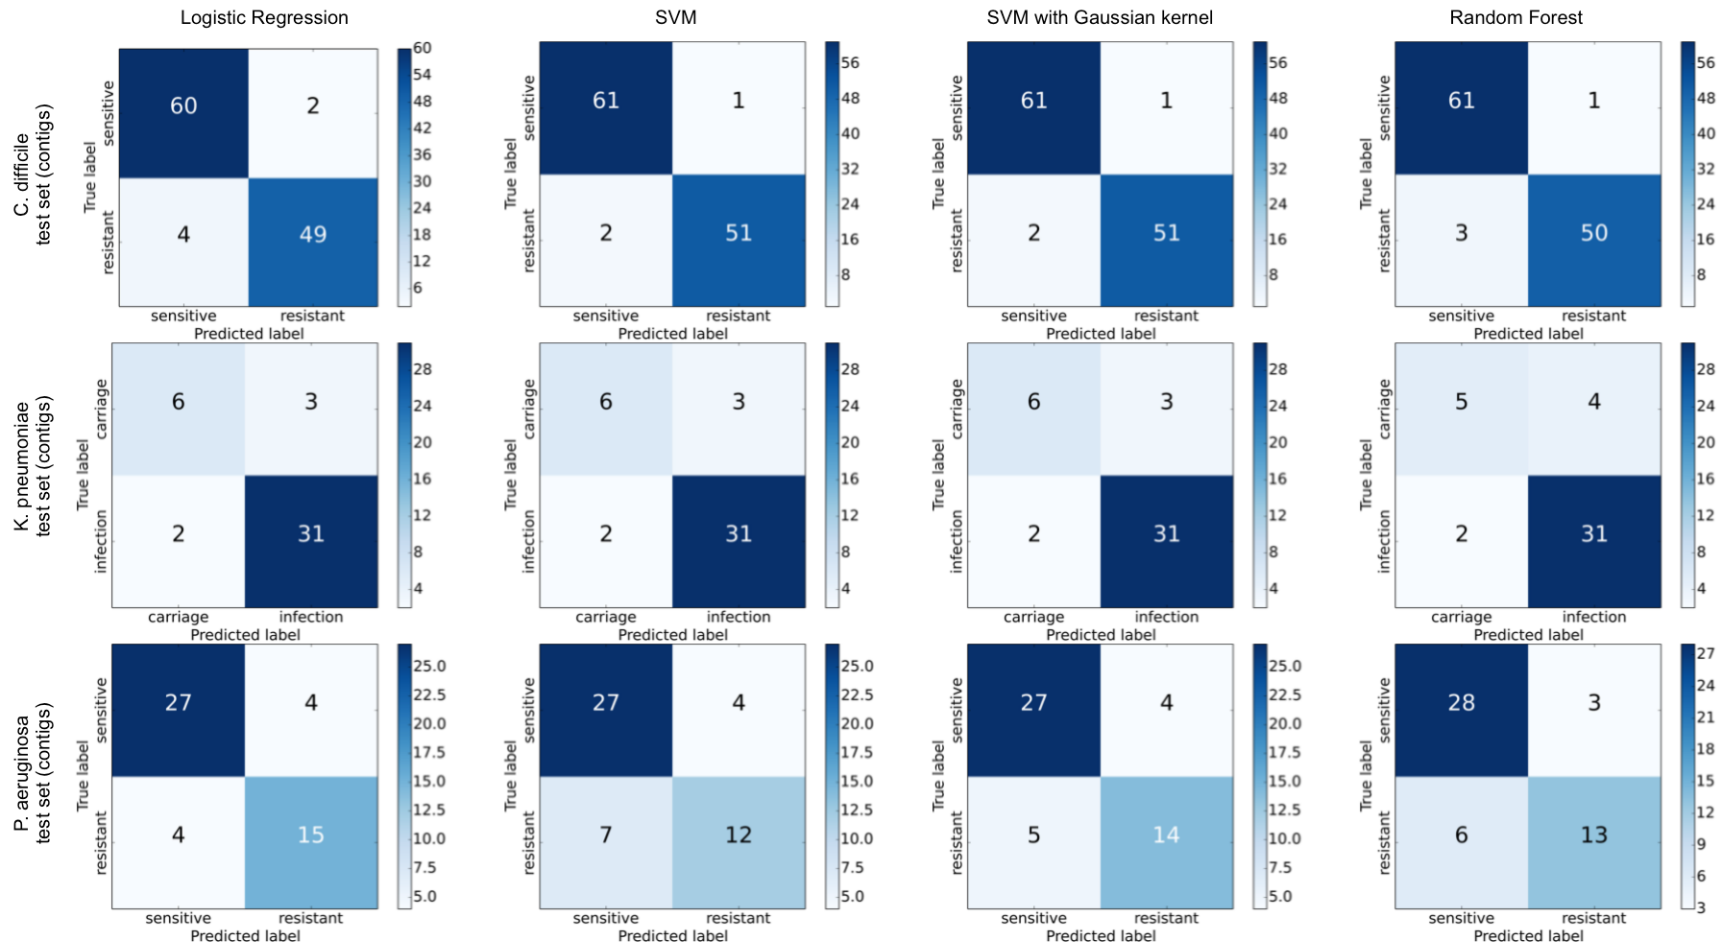

**Fig S3D. The confusion matrices of classification models on reads (N  $k$ -mers = 10,000)**

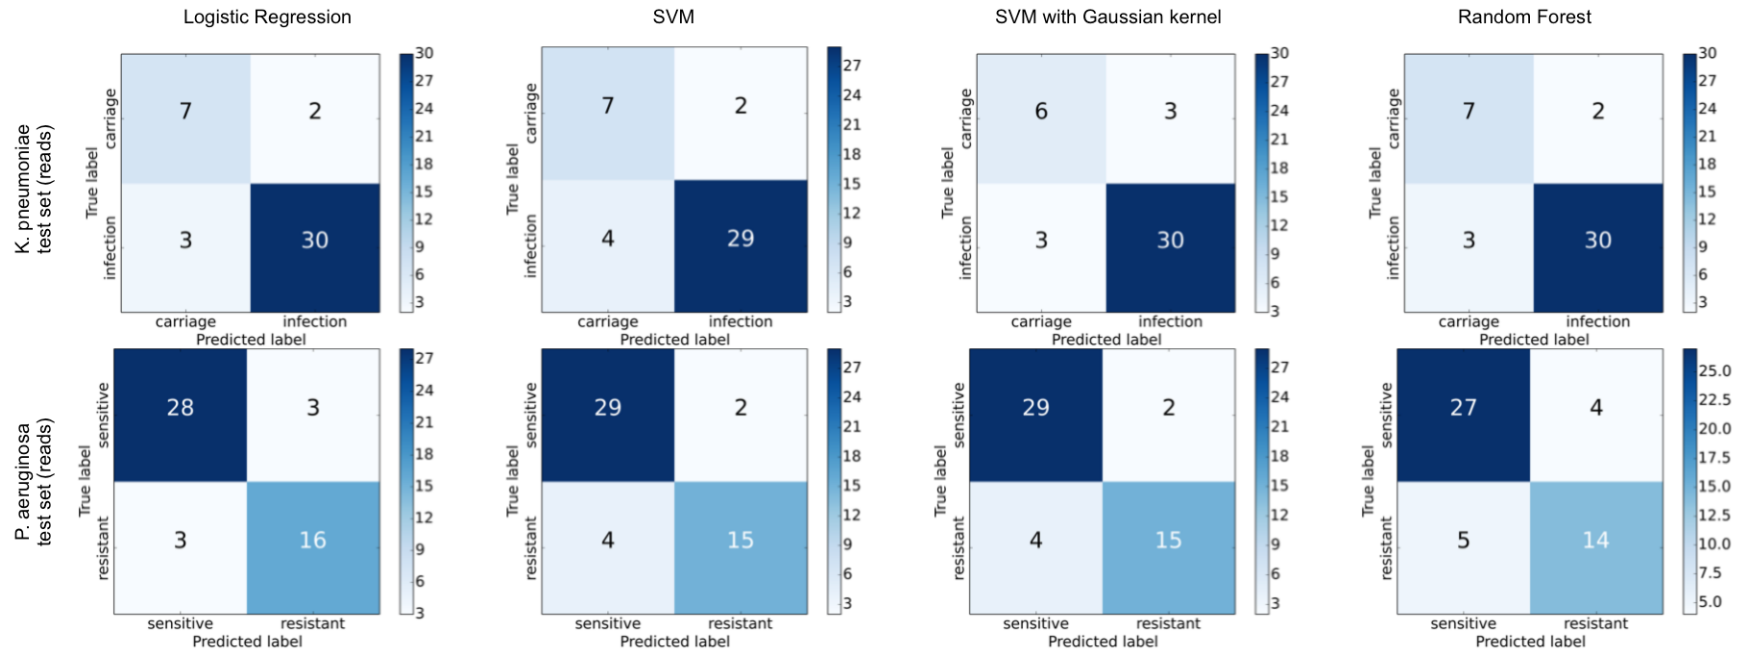

**Fig S3E. The confusion matrices of classification models on contigs (N  $k$ -mers = 100,000)**

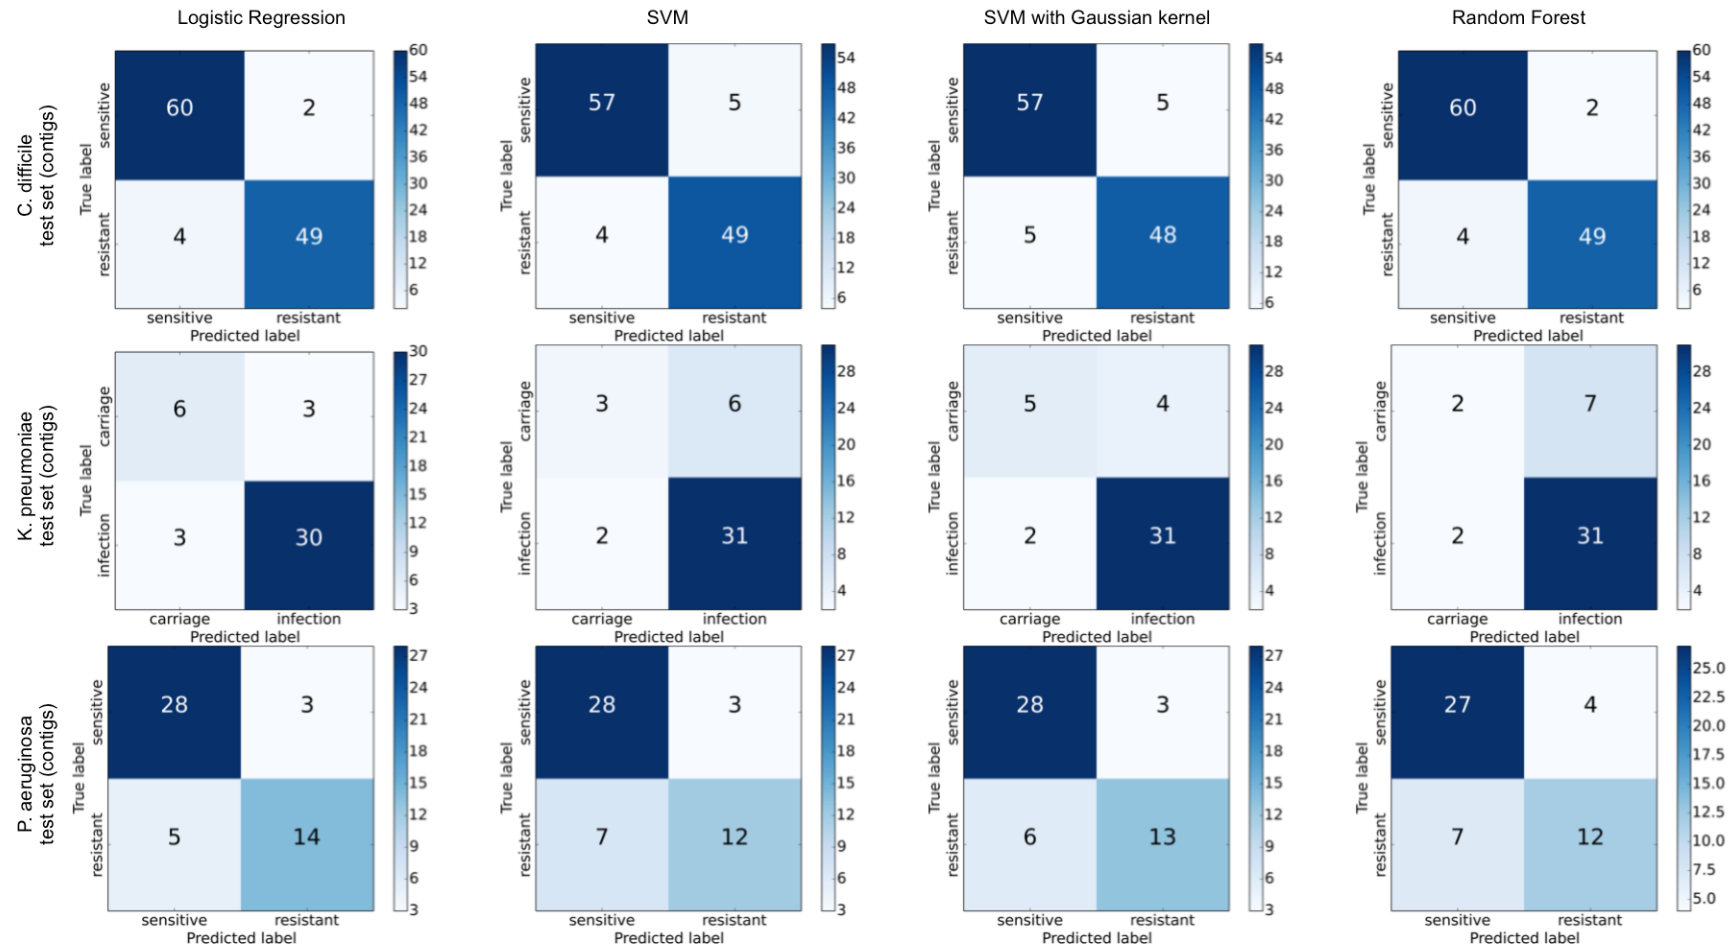

**Fig S3F. The confusion matrices of classification models on contigs (N  $k$ -mers = 100,000)**

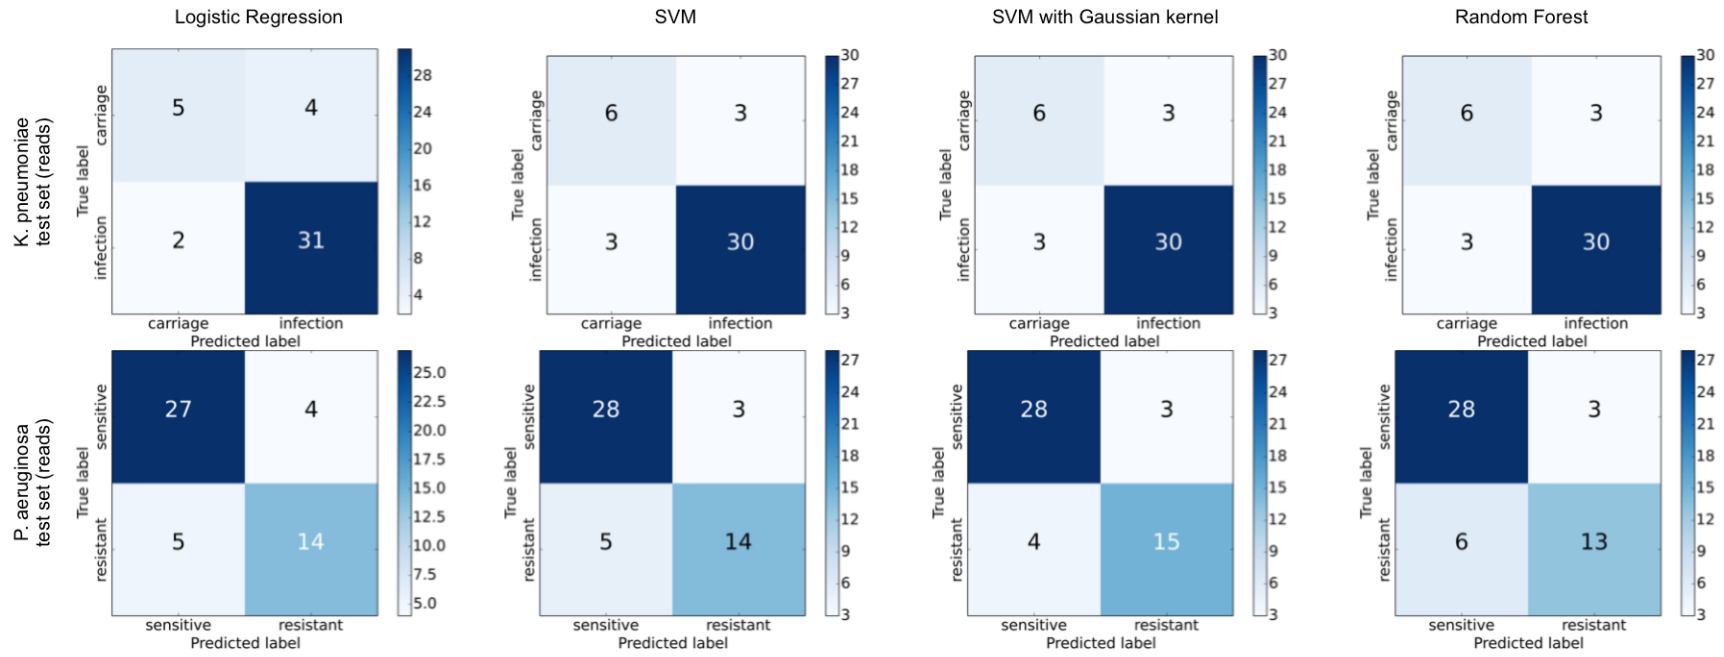

Supplement: pcbi.1006434.s003.pdf [file pcbi.1006434.s003.pdf]
