# Supplementary material for: A k-mer-based method for the identification of phenotype-associated genomic biomarkers and predicting phenotypes of sequenced bacteria
Source: PubMed Central journal article supplement (PMC6211763; doi:10.1371/journal.pcbi.1006434), 2018-10-22
Supplement: pcbi.1006434.s004.pdf [file pcbi.1006434.s004.pdf]

## The effects of different p-value cut-offs on model performances on *P. aeruginosa* dataset

**Table A.** Results of logistic regressions performed with k-mers of length 16 and Lasso regularization. Different k-mer association p-value cut-offs were used.

| Cut-off for chi-squared test p-value                      | 1E-02   | 1E-03   | 1E-04  | 1E-05 | 1E-06 | 1E-07 |
|-----------------------------------------------------------|---------|---------|--------|-------|-------|-------|
| <b>Total k-mers in logistic regression model</b>          | 565,742 | 275,243 | 29,642 | 3,569 | 578   | 102   |
| <b>K-mers in model with coefficient not equal to zero</b> | 100,948 | 15,978  | 1,562  | 384   | 81    | 101   |
| <b>Mean accuracy on the test set</b>                      | 0.76    | 0.8     | 0.82   | 0.78  | 0.84  | 0.8   |
| <b>Sensitivity on the test set</b>                        | 0.65    | 0.7     | 0.7    | 0.61  | 0.74  | 0.74  |
| <b>Specificity on the test set</b>                        | 0.85    | 0.89    | 0.93   | 0.93  | 0.93  | 0.85  |
| <b>Avg. precision on the test set</b>                     | 0.76    | 0.81    | 0.83   | 0.80  | 0.85  | 0.8   |
| <b>Avg. recall on the test set</b>                        | 0.76    | 0.80    | 0.82   | 0.78  | 0.84  | 0.8   |
| <b>Avg. f1-score on the test set</b>                      | 0.76    | 0.80    | 0.82   | 0.77  | 0.84  | 0.8   |

**Table B.** Results of logistic regressions performed with k-mers of length 16 and Ridge regularization. Different k-mer association p-value cut-offs were used.

| Cut-off for chi-squared test p-value       | 1E-02   | 1E-03   | 1E-04  | 1E-05 | 1E-06 | 1E-07 |
|--------------------------------------------|---------|---------|--------|-------|-------|-------|
| <b>K-mers in logistic regression model</b> | 565,742 | 275,243 | 29,642 | 3,569 | 578   | 102   |
| <b>Mean accuracy on the test set</b>       | 0.8     | 0.78    | 0.78   | 0.78  | 0.84  | 0.8   |
| <b>Sensitivity on the test set</b>         | 0.61    | 0.61    | 0.61   | 0.61  | 0.7   | 0.74  |
| <b>Specificity on the test set</b>         | 0.96    | 0.93    | 0.93   | 0.93  | 0.89  | 0.85  |
| <b>Avg. precision on the test set</b>      | 0.83    | 0.8     | 0.8    | 0.8   | 0.85  | 0.8   |
| <b>Avg. recall on the test set</b>         | 0.8     | 0.78    | 0.78   | 0.78  | 0.84  | 0.8   |
| <b>Avg. f1-score on the test set</b>       | 0.79    | 0.77    | 0.77   | 0.77  | 0.84  | 0.8   |

**Table C.** Results of logistic regressions performed with k-mers of length 13 and Lasso regularization. Different k-mer association p-value cut-offs were used.

| Cut-off for chi-squared test p-value       | 1E-02   | 1E-03   | 1E-04  | 1E-05 | 1E-06 | 1E-07 |
|--------------------------------------------|---------|---------|--------|-------|-------|-------|
| <b>K-mers in logistic regression model</b> | 291,785 | 127,070 | 17,455 | 2,359 | 385   | 60    |

|                                                           |        |        |      |      |      |      |
|-----------------------------------------------------------|--------|--------|------|------|------|------|
| <b>K-mers in model with coefficient not equal to zero</b> | 11,208 | 62,367 | 822  | 221  | 91   | 27   |
| <b>Mean accuracy on the test set</b>                      | 0.76   | 0.78   | 0.84 | 0.82 | 0.86 | 0.82 |
| <b>Sensitivity on the test set</b>                        | 0.65   | 0.7    | 0.74 | 0.74 | 0.83 | 0.74 |
| <b>Specificity on the test set</b>                        | 0.85   | 0.85   | 0.93 | 0.89 | 0.89 | 0.89 |
| <b>Avg. precision on the test set</b>                     | 0.74   | 0.77   | 0.81 | 0.80 | 0.86 | 0.80 |
| <b>Avg. recall on the test set</b>                        | 0.79   | 0.80   | 0.89 | 0.85 | 0.86 | 0.85 |
| <b>Avg. f1-score on the test set</b>                      | 0.76   | 0.78   | 0.85 | 0.82 | 0.86 | 0.82 |

**Table D.** Results of linear regressions performed with k-mers of length 16 and Lasso regularization. Different k-mer association p-value cut-offs were used.

| <b>Cut-off for Welch two-sample t-test p-value</b>     | <b>1E-5</b> | <b>1E-10</b> | <b>1E-20</b> | <b>1E-30</b> | <b>1E-40</b> |
|--------------------------------------------------------|-------------|--------------|--------------|--------------|--------------|
| <b>K-mers in linear regression model</b>               | 1,551,651   | 1,140,036    | 973,402      | 529,634      | 503,636      |
| <b>Mean squared error on the test subset</b>           | 6.27        | 5.28         | 5.44         | 7.65         | 9.21         |
| <b>Coefficient of determination on the test subset</b> | 0.37        | 0.47         | 0.45         | 0.23         | 0.08         |

**Table E.** Results of linear regressions performed with k-mers of length 16 (only k-mers presented in more than 10 and less than 190 strains used) and Lasso regularization. Different k-mer association p-value cut-offs were used.

| <b>Cut-off for Welch two-sample t-test p-value</b>     | <b>1E-05</b> | <b>1E-10</b> | <b>1E-15</b> | <b>1E-20</b> |
|--------------------------------------------------------|--------------|--------------|--------------|--------------|
| <b>K-mers in linear regression model</b>               | 92,907       | 6,712        | 1,296        | 135          |
| <b>Mean squared error on the test subset</b>           | 6.5          | 6.1          | 6.4          | 7.7          |
| <b>Coefficient of determination on the test subset</b> | 0.35         | 0.39         | 0.36         | 0.23         |
