# Supplementary material for: A k-mer-based method for the identification of phenotype-associated genomic biomarkers and predicting phenotypes of sequenced bacteria
Source: PubMed Central journal article supplement (PMC6211763; doi:10.1371/journal.pcbi.1006434), 2018-10-22
Supplement: pcbi.1006434.s006.pdf [file pcbi.1006434.s006.pdf]

The performance of different machine learning models on the datasets.

**Table A. Performance of logistic regression models (N  $k$ -mers = 1,000)**

| Dataset                                 |              | Mean accuracy | F1-score | Sensitivity | Specificity | AUC-ROC | Average precision | MCC  | Cohen's kappa | Very Major Error rate | Major Error rate |
|-----------------------------------------|--------------|---------------|----------|-------------|-------------|---------|-------------------|------|---------------|-----------------------|------------------|
| <b>Pseudomonas aeruginosa (contigs)</b> | Training set | 0.92          | 0.92     | 0.84        | 0.97        | 0.91    | 0.96              | 0.83 | 0.83          | 6%                    | 2%               |
|                                         | Test set     | 0.88          | 0.88     | 0.84        | 0.90        | 0.87    | 0.92              | 0.75 | 0.75          | 6%                    | 6%               |
| <b>Pseudomonas aeruginosa (reads)</b>   | Training set | 0.95          | 0.95     | 0.90        | 0.99        | 0.94    | 0.99              | 0.90 | 0.90          | 4.0%                  | 0.7%             |
|                                         | Test set     | 0.88          | 0.88     | 0.84        | 0.90        | 0.87    | 0.93              | 0.75 | 0.75          | 6.0%                  | 6.0%             |
| <b>Clostridium difficile (contigs)</b>  | Training set | 1.0           | 1.0      | 1.0         | 1.0         | 1.0     | 1.0               | 0.99 | 0.99          | 0.0%                  | 0.3%             |
|                                         | Test set     | 0.97          | 0.97     | 0.96        | 0.97        | 0.97    | 0.97              | 0.93 | 0.93          | 1.7%                  | 1.7%             |
| <b>Klebsiella pneumoniae (contigs)</b>  | Training set | 0.96          | 0.96     | 0.99        | 0.85        | 0.92    | 1.0               | 0.88 | 0.88          | 0.8%                  | 3.2%             |
|                                         | Test set     | 0.88          | 0.88     | 0.91        | 0.78        | 0.84    | 0.97              | 0.66 | 0.66          | 7.1%                  | 4.8%             |
| <b>Klebsiella pneumoniae (reads)</b>    | Training set | 0.98          | 0.98     | 0.99        | 0.93        | 0.96    | 1.0               | 0.93 | 0.93          | 0.8%                  | 1.6%             |
|                                         | Test set     | 0.88          | 0.88     | 0.91        | 0.78        | 0.84    | 0.98              | 0.66 | 0.66          | 7.1%                  | 4.8%             |

**Table B. Performance of logistic regression models (N *k*-mers = 10,000)**

| Dataset                                 |              | Mean accuracy | F1-score | Sensitivity | Specificity | AUC-ROC | Average precision | MCC  | Cohen's kappa | Very Major Error rate | Major Error rate |
|-----------------------------------------|--------------|---------------|----------|-------------|-------------|---------|-------------------|------|---------------|-----------------------|------------------|
| <b>Pseudomonas aeruginosa (contigs)</b> | Training set | 0.90          | 0.90     | 0.83        | 0.95        | 0.89    | 0.95              | 0.79 | 0.78          | 6.7%                  | 3.3%             |
|                                         | Test set     | 0.84          | 0.84     | 0.80        | 0.87        | 0.83    | 0.92              | 0.66 | 0.66          | 8.0%                  | 8.0%             |
| <b>Pseudomonas aeruginosa (reads)</b>   | Training set | 0.97          | 0.97     | 0.91        | 1.0         | 0.96    | 1.0               | 0.93 | 0.93          | 3.3%                  | 0.0%             |
|                                         | Test set     | 0.88          | 0.88     | 0.84        | 0.90        | 0.87    | 0.90              | 0.75 | 0.75          | 6.0%                  | 6.0%             |
| <b>Clostridium difficile (contigs)</b>  | Training set | 0.99          | 0.99     | 0.99        | 1.0         | 0.99    | 1.0               | 0.98 | 0.98          | 0.6%                  | 0.3%             |
|                                         | Test set     | 0.95          | 0.95     | 0.93        | 0.97        | 0.95    | 0.97              | 0.90 | 0.90          | 3.5%                  | 1.7%             |
| <b>Klebsiella pneumoniae (contigs)</b>  | Training set | 1.0           | 1.0      | 1.0         | 1.0         | 1.0     | 1.0               | 1.0  | 1.0           | 0.0%                  | 0.0%             |
|                                         | Test set     | 0.88          | 0.88     | 0.94        | 0.67        | 0.80    | 0.98              | 0.63 | 0.63          | 4.8%                  | 7.1%             |
| <b>Klebsiella pneumoniae (reads)</b>    | Training set | 1.0           | 1.0      | 1.0         | 1.0         | 1.0     | 1.0               | 1.0  | 1.0           | 0.0%                  | 0.0%             |
|                                         | Test set     | 0.88          | 0.88     | 0.91        | 0.78        | 0.84    | 0.99              | 0.66 | 0.66          | 7.1%                  | 4.8%             |

**Table C. Performance of logistic regression models (N *k*-mers = 100,000)**

| Dataset                                 |              | Mean accuracy | F1-score | Sensitivity | Specificity | AUC-ROC | Average precision | MCC  | Cohen's kappa | Very Major Error rate | Major Error rate |
|-----------------------------------------|--------------|---------------|----------|-------------|-------------|---------|-------------------|------|---------------|-----------------------|------------------|
| <b>Pseudomonas aeruginosa (contigs)</b> | Training set | 0.92          | 0.92     | 0.84        | 0.96        | 0.91    | 0.96              | 0.83 | 0.83          | 6.0%                  | 2.0%             |
|                                         | Test set     | 0.84          | 0.84     | 0.74        | 0.90        | 0.82    | 0.89              | 0.66 | 0.65          | 10.0%                 | 6.0%             |
| <b>Pseudomonas aeruginosa (reads)</b>   | Training set | 1.0           | 1.0      | 1.0         | 1.0         | 1.0     | 1.0               | 1.0  | 1.0           | 0.0%                  | 0.0%             |
|                                         | Test set     | 0.82          | 0.82     | 0.74        | 0.87        | 0.80    | 0.88              | 0.62 | 0.61          | 10.0%                 | 8.0%             |
| <b>Clostridium difficile (contigs)</b>  | Training set | 0.99          | 0.99     | 0.99        | 0.99        | 0.99    | 1.0               | 0.98 | 0.98          | 0.6%                  | 0.6%             |
|                                         | Test set     | 0.95          | 0.95     | 0.93        | 0.97        | 0.95    | 0.95              | 0.90 | 0.90          | 3.5%                  | 1.7%             |
| <b>Klebsiella pneumoniae (contigs)</b>  | Training set | 1.0           | 1.0      | 1.0         | 1.0         | 1.0     | 1.0               | 1.0  | 1.0           | 0.0%                  | 0.0%             |
|                                         | Test set     | 0.86          | 0.86     | 0.91        | 0.67        | 0.79    | 0.99              | 0.58 | 0.58          | 7.1%                  | 7.1%             |
| <b>Klebsiella pneumoniae (reads)</b>    | Training set | 1.0           | 1.0      | 1.0         | 1.0         | 1.0     | 1.0               | 1.0  | 1.0           | 0.0%                  | 0.0%             |
|                                         | Test set     | 0.86          | 0.85     | 0.94        | 0.56        | 0.75    | 0.97              | 0.55 | 0.54          | 4.8%                  | 9.5%             |

**Table D. Performance of support vector machine models (N *k*-mers = 1,000)**

| Dataset                                 |              | Mean accuracy | F1-score | Sensitivity | Specificity | AUC-ROC | Average precision | MCC  | Cohen's kappa | Very Major Error rate | Major Error rate |
|-----------------------------------------|--------------|---------------|----------|-------------|-------------|---------|-------------------|------|---------------|-----------------------|------------------|
| <b>Pseudomonas aeruginosa (contigs)</b> | Training set | 0.87          | 0.87     | 0.75        | 0.95        | 0.85    | 0.91              | 0.73 | 0.72          | 9.3%                  | 3.3%             |
|                                         | Test set     | 0.84          | 0.84     | 0.84        | 0.84        | 0.84    | 0.87              | 0.70 | 0.67          | 6.0%                  | 10.0%            |
| <b>Pseudomonas aeruginosa (reads)</b>   | Training set | 1.0           | 1.0      | 1.0         | 1.0         | 1.0     | 1.0               | 1.0  | 1.0           | 0.0%                  | 0.0%             |
|                                         | Test set     | 0.84          | 0.84     | 0.84        | 0.84        | 0.84    | 0.84              | 0.70 | 0.67          | 6.0%                  | 10.0%            |
| <b>Clostridium difficile (contigs)</b>  | Training set | 0.99          | 0.99     | 0.99        | 1.0         | 0.99    | 1.0               | 0.99 | 0.99          | 0.3%                  | 0.3%             |
|                                         | Test set     | 0.97          | 0.97     | 0.96        | 0.98        | 0.97    | 0.97              | 0.95 | 0.95          | 1.7%                  | 0.9%             |
| <b>Klebsiella pneumoniae (contigs)</b>  | Training set | 1.0           | 1.0      | 1.0         | 1.0         | 1.0     | 1.0               | 1.0  | 1.0           | 0.0%                  | 0.0%             |
|                                         | Test set     | 0.88          | 0.88     | 0.91        | 0.78        | 0.84    | 0.98              | 0.66 | 0.66          | 7.1%                  | 4.8%             |
| <b>Klebsiella pneumoniae (reads)</b>    | Training set | 0.99          | 0.99     | 0.99        | 1.0         | 1.0     | 1.0               | 0.98 | 0.98          | 0.8%                  | 0.0%             |
|                                         | Test set     | 0.83          | 0.84     | 0.88        | 0.67        | 0.77    | 0.98              | 0.53 | 0.53          | 9.5%                  | 7.1%             |

**Table E. Performance of support vector machine models (N *k*-mers = 10,000)**

| Dataset                                 |              | Mean accuracy | F1-score | Sensitivity | Specificity | AUC-ROC | Average precision | MCC  | Cohen's kappa | Very Major Error rate | Major Error rate |
|-----------------------------------------|--------------|---------------|----------|-------------|-------------|---------|-------------------|------|---------------|-----------------------|------------------|
| <b>Pseudomonas aeruginosa (contigs)</b> | Training set | 0.85          | 0.85     | 0.70        | 0.95        | 0.82    | 0.90              | 0.69 | 0.68          | 11.3%                 | 3.3%             |
|                                         | Test set     | 0.78          | 0.78     | 0.63        | 0.87        | 0.75    | 0.84              | 0.52 | 0.52          | 14.0%                 | 8.0%             |
| <b>Pseudomonas aeruginosa (reads)</b>   | Training set | 1.0           | 1.0      | 1.0         | 1.0         | 1.0     | 1.0               | 1.0  | 1.0           | 0.0%                  | 0.0%             |
|                                         | Test set     | 0.88          | 0.88     | 0.79        | 0.94        | 0.86    | 0.88              | 0.74 | 0.74          | 8.0%                  | 4.0%             |
| <b>Clostridium difficile (contigs)</b>  | Training set | 1.0           | 1.0      | 1.0         | 1.0         | 1.0     | 1.0               | 0.99 | 0.99          | 0.0%                  | 0.3%             |
|                                         | Test set     | 0.97          | 0.97     | 0.96        | 0.98        | 0.97    | 0.97              | 0.95 | 0.95          | 1.7%                  | 0.9%             |
| <b>Klebsiella pneumoniae (contigs)</b>  | Training set | 1.0           | 0.99     | 0.96        | 0.98        | 1.0     | 0.98              | 0.98 | 0.98          | 0.0%                  | 0.8%             |
|                                         | Test set     | 0.88          | 0.88     | 0.94        | 0.67        | 0.80    | 0.98              | 0.63 | 0.63          | 4.8%                  | 7.1%             |
| <b>Klebsiella pneumoniae (reads)</b>    | Training set | 1.0           | 1.0      | 1.0         | 1.0         | 1.0     | 1.0               | 1.0  | 1.0           | 0.0%                  | 0.0%             |
|                                         | Test set     | 0.86          | 0.86     | 0.88        | 0.78        | 0.83    | 0.99              | 0.61 | 0.61          | 9.5%                  | 4.8%             |

**Table F. Performance of support vector machine models (N  $k$ -mers = 100,000)**

| Dataset                                 |              | Mean accuracy | F1-score | Sensitivity | Specificity | AUC-ROC | Average precision | MCC  | Cohen's kappa | Very Major Error rate | Major Error rate |
|-----------------------------------------|--------------|---------------|----------|-------------|-------------|---------|-------------------|------|---------------|-----------------------|------------------|
| <b>Pseudomonas aeruginosa (contigs)</b> | Training set | 0.95          | 0.95     | 0.91        | 0.98        | 0.95    | 0.99              | 0.90 | 0.90          | 3.3%                  | 1.3%             |
|                                         | Test set     | 0.8           | 0.79     | 0.63        | 0.90        | 0.77    | 0.84              | 0.57 | 0.56          | 14.0%                 | 6.0%             |
| <b>Pseudomonas aeruginosa (reads)</b>   | Training set | 0.92          | 0.92     | 0.84        | 0.97        | 0.91    | 0.96              | 0.83 | 0.83          | 6.0%                  | 2.0%             |
|                                         | Test set     | 0.84          | 0.84     | 0.74        | 0.90        | 0.82    | 0.90              | 0.66 | 0.65          | 10.0%                 | 6.0%             |
| <b>Clostridium difficile (contigs)</b>  | Training set | 1.0           | 1.0      | 1.0         | 1.0         | 1.0     | 1.0               | 1.0  | 1.0           | 0.0%                  | 0.0%             |
|                                         | Test set     | 0.92          | 0.92     | 0.93        | 0.92        | 0.92    | 0.96              | 0.84 | 0.84          | 3.5%                  | 4.4%             |
| <b>Klebsiella pneumoniae (contigs)</b>  | Training set | 0.96          | 0.96     | 1.0         | 0.82        | 0.91    | 1.0               | 0.88 | 0.87          | 0.0%                  | 4.0%             |
|                                         | Test set     | 0.81          | 0.79     | 0.94        | 0.33        | 0.64    | 0.97              | 0.35 | 0.33          | 4.8%                  | 14.3%            |
| <b>Klebsiella pneumoniae (reads)</b>    | Training set | 0.95          | 0.95     | 0.95        | 0.99        | 0.82    | 1.0               | 0.86 | 0.85          | 0.8%                  | 4.0%             |
|                                         | Test set     | 0.86          | 0.86     | 0.91        | 0.67        | 0.79    | 0.98              | 0.58 | 0.58          | 7.1%                  | 7.1%             |

**Table G. Performance of support vector machine models with Gaussian kernel function (N *k*-mers = 1,000)**

| Dataset                                 |              | Mean accuracy | F1-score | Sensitivity | Specificity | AUC-ROC | Average precision | MCC  | Cohen's kappa | Very Major Error rate | Major Error rate |
|-----------------------------------------|--------------|---------------|----------|-------------|-------------|---------|-------------------|------|---------------|-----------------------|------------------|
| <b>Pseudomonas aeruginosa (contigs)</b> | Training set | 0.89          | 0.89     | 0.79        | 0.95        | 0.87    | 0.94              | 0.76 | 0.75          | 8.0%                  | 3.3%             |
|                                         | Test set     | 0.84          | 0.84     | 0.84        | 0.84        | 0.84    | 0.84              | 0.67 | 0.67          | 6.0%                  | 10.0%            |
| <b>Pseudomonas aeruginosa (reads)</b>   | Training set | 1.0           | 1.0      | 1.0         | 1.0         | 1.0     | 1.0               | 1.0  | 1.0           | 0.0%                  | 0.0%             |
|                                         | Test set     | 0.82          | 0.82     | 0.84        | 0.81        | 0.82    | 0.83              | 0.63 | 0.63          | 6.0%                  | 12.0%            |
| <b>Clostridium difficile (contigs)</b>  | Training set | 1.0           | 1.0      | 1.0         | 1.0         | 1.0     | 1.0               | 0.99 | 0.99          | 0.0%                  | 0.3%             |
|                                         | Test set     | 0.97          | 0.97     | 0.96        | 0.98        | 0.97    | 0.97              | 0.95 | 0.95          | 1.7%                  | 0.9%             |
| <b>Klebsiella pneumoniae (contigs)</b>  | Training set | 1.0           | 1.0      | 1.0         | 1.0         | 1.0     | 1.0               | 1.0  | 1.0           | 0.0%                  | 0.0%             |
|                                         | Test set     | 0.86          | 0.86     | 0.91        | 0.67        | 0.79    | 0.99              | 0.58 | 0.58          | 7.1%                  | 7.1%             |
| <b>Klebsiella pneumoniae (reads)</b>    | Training set | 1.0           | 1.0      | 1.0         | 1.0         | 1.0     | 1.0               | 1.0  | 1.0           | 0.0%                  | 0.0%             |
|                                         | Test set     | 0.88          | 0.88     | 0.91        | 0.78        | 0.84    | 0.98              | 0.66 | 0.66          | 7.1%                  | 4.8%             |

**Table H. Performance of support vector machine models with Gaussian kernel function (N *k*-mers = 10,000)**

| Dataset                                 |              | Mean accuracy | F1-score | Sensitivity | Specificity | AUC-ROC | Average precision | MCC  | Cohen's kappa | Very Major Error rate | Major Error rate |
|-----------------------------------------|--------------|---------------|----------|-------------|-------------|---------|-------------------|------|---------------|-----------------------|------------------|
| <b>Pseudomonas aeruginosa (contigs)</b> | Training set | 0.99          | 0.99     | 0.98        | 0.99        | 0.99    | 1.0               | 0.97 | 0.97          | 0.7%                  | 0.7%             |
|                                         | Test set     | 0.82          | 0.82     | 0.74        | 0.87        | 0.80    | 0.86              | 0.62 | 0.61          | 10.0%                 | 8.0%             |
| <b>Pseudomonas aeruginosa (reads)</b>   | Training set | 0.99          | 0.99     | 0.98        | 1.0         | 0.99    | 1.0               | 0.99 | 0.99          | 0.67%                 | 0.0%             |
|                                         | Test set     | 0.88          | 0.88     | 0.79        | 0.94        | 0.86    | 0.88              | 0.74 | 0.74          | 8.0%                  | 4.0%             |
| <b>Clostridium difficile (contigs)</b>  | Training set | 1.0           | 1.0      | 1.0         | 1.0         | 1.0     | 1.0               | 1.0  | 1.0           | 0.0%                  | 0.0%             |
|                                         | Test set     | 0.97          | 0.97     | 0.96        | 0.98        | 0.97    | 0.97              | 0.95 | 0.95          | 1.7%                  | 0.9%             |
| <b>Klebsiella pneumoniae (contigs)</b>  | Training set | 1.0           | 1.0      | 1.0         | 1.0         | 1.0     | 1.0               | 1.0  | 1.0           | 0.0%                  | 0.0%             |
|                                         | Test set     | 0.88          | 0.88     | 0.94        | 0.67        | 0.80    | 0.98              | 0.63 | 0.63          | 4.8%                  | 7.1%             |
| <b>Klebsiella pneumoniae (reads)</b>    | Training set | 1.0           | 1.0      | 1.0         | 1.0         | 1.0     | 1.0               | 1.0  | 1.0           | 0.0%                  | 0.0%             |
|                                         | Test set     | 0.86          | 0.86     | 0.91        | 0.67        | 0.79    | 0.95              | 0.58 | 0.58          | 7.1%                  | 7.1%             |



**Table I. Performance of support vector machine models with Gaussian kernel function (N *k*-mers = 100,000)**

| Dataset                                 |              | Mean accuracy | F1-score | Sensitivity | Specificity | AUC-ROC | Average precision | MCC  | Cohen's kappa | Very Major Error rate | Major Error rate |
|-----------------------------------------|--------------|---------------|----------|-------------|-------------|---------|-------------------|------|---------------|-----------------------|------------------|
| <b>Pseudomonas aeruginosa (contigs)</b> | Training set | 0.97          | 0.97     | 0.93        | 0.99        | 0.96    | 1.0               | 0.93 | 0.93          | 2.7%                  | 0.7%             |
|                                         | Test set     | 0.82          | 0.82     | 0.68        | 0.90        | 0.79    | 0.87              | 0.61 | 0.61          | 12.0%                 | 6.0%             |
| <b>Pseudomonas aeruginosa (reads)</b>   | Training set | 1.0           | 1.0      | 1.0         | 1.0         | 1.0     | 1.0               | 1.0  | 1.0           | 0.0%                  | 0.0%             |
|                                         | Test set     | 0.86          | 0.86     | 0.80        | 0.90        | 0.85    | 0.88              | 0.70 | 0.70          | 8.0%                  | 6.0%             |
| <b>Clostridium difficile (contigs)</b>  | Training set | 1.0           | 1.0      | 1.0         | 1.0         | 1.0     | 1.0               | 1.0  | 1.0           | 0.0%                  | 0.0%             |
|                                         | Test set     | 0.91          | 0.91     | 0.91        | 0.92        | 0.91    | 0.95              | 0.83 | 0.83          | 4.4%                  | 4.4%             |
| <b>Klebsiella pneumoniae (contigs)</b>  | Training set | 1.0           | 1.0      | 1.0         | 1.0         | 1.0     | 1.0               | 1.0  | 1.0           | 0.0%                  | 0.0%             |
|                                         | Test set     | 0.86          | 0.85     | 0.94        | 0.56        | 0.75    | 0.98              | 0.55 | 0.54          | 4.8%                  | 9.5%             |
| <b>Klebsiella pneumoniae (reads)</b>    | Training set | 1.0           | 1.0      | 1.0         | 1.0         | 1.0     | 1.0               | 1.0  | 1.0           | 0.0%                  | 0.0%             |
|                                         | Test set     | 0.86          | 0.86     | 0.91        | 0.67        | 0.79    | 0.99              | 0.58 | 0.58          | 7.1%                  | 7.1%             |

**Table J. Performance of random forest models (N *k*-mers = 1,000)**

| Dataset                                 |              | Mean accuracy | F1-score | Sensitivity | Specificity | AUC-ROC | Average precision | MCC  | Cohen's kappa | Very Major Error rate | Major Error rate |
|-----------------------------------------|--------------|---------------|----------|-------------|-------------|---------|-------------------|------|---------------|-----------------------|------------------|
| <b>Pseudomonas aeruginosa (contigs)</b> | Training set | 0.99          | 0.99     | 0.98        | 0.99        | 0.99    | 0.99              | 0.97 | 0.97          | 0.7%                  | 0.7%             |
|                                         | Test set     | 0.86          | 0.86     | 0.79        | 0.90        | 0.85    | 0.90              | 0.70 | 0.70          | 8.0%                  | 6.0%             |
| <b>Pseudomonas aeruginosa (reads)</b>   | Training set | 1.0           | 1.0      | 1.0         | 1.0         | 1.0     | 1.0               | 1.0  | 1.0           | 0.0%                  | 0.0%             |
|                                         | Test set     | 0.82          | 0.82     | 0.80        | 0.84        | 0.81    | 0.85              | 0.62 | 0.62          | 8.0%                  | 10.0%            |
| <b>Clostridium difficile (contigs)</b>  | Training set | 1.0           | 1.0      | 1.0         | 1.0         | 1.0     | 1.0               | 1.0  | 1.0           | 0.0%                  | 0.0%             |
|                                         | Test set     | 0.97          | 0.97     | 0.96        | 0.98        | 0.97    | 0.98              | 0.95 | 0.95          | 1.7%                  | 0.9%             |
| <b>Klebsiella pneumoniae (contigs)</b>  | Training set | 1.0           | 1.0      | 1.0         | 1.0         | 1.0     | 1.0               | 1.0  | 1.0           | 0.0%                  | 0.0%             |
|                                         | Test set     | 0.86          | 0.86     | 0.91        | 0.67        | 0.79    | 0.92              | 0.58 | 0.58          | 7.1%                  | 7.1%             |
| <b>Klebsiella pneumoniae (reads)</b>    | Training set | 1.0           | 1.0      | 1.0         | 1.0         | 1.0     | 1.0               | 1.0  | 1.0           | 0.0%                  | 0.0%             |
|                                         | Test set     | 0.88          | 0.88     | 0.91        | 0.78        | 0.84    | 0.98              | 0.67 | 0.67          | 7.1%                  | 4.8%             |

**Table K. Performance of random forest models (N *k*-mers = 10,000)**

| Dataset                                 |              | Mean accuracy | F1-score | Sensitivity | Specificity | AUC-ROC | Average precision | MCC  | Cohen's kappa | Very Major Error rate | Major Error rate |
|-----------------------------------------|--------------|---------------|----------|-------------|-------------|---------|-------------------|------|---------------|-----------------------|------------------|
| <b>Pseudomonas aeruginosa (contigs)</b> | Training set | 0.99          | 0.99     | 1.0         | 0.99        | 0.99    | 1.0               | 0.99 | 0.99          | 0.0%                  | 0.67%            |
|                                         | Test set     | 0.82          | 0.82     | 0.68        | 0.90        | 0.79    | 0.86              | 0.61 | 0.61          | 12.0%                 | 6.0%             |
| <b>Pseudomonas aeruginosa (reads)</b>   | Training set | 1.0           | 1.0      | 1.0         | 1.0         | 1.0     | 1.0               | 1.0  | 1.0           | 0.0%                  | 0.0%             |
|                                         | Test set     | 0.82          | 0.82     | 0.74        | 0.87        | 0.80    | 0.88              | 0.61 | 0.61          | 10.0%                 | 8.0%             |
| <b>Clostridium difficile (contigs)</b>  | Training set | 1.0           | 1.0      | 1.0         | 1.0         | 1.0     | 1.0               | 1.0  | 1.0           | 0.0%                  | 0.0%             |
|                                         | Test set     | 0.97          | 0.97     | 0.94        | 0.98        | 0.96    | 0.98              | 0.93 | 0.93          | 2.6%                  | 0.9%             |
| <b>Klebsiella pneumoniae (contigs)</b>  | Training set | 1.0           | 1.0      | 1.0         | 1.0         | 1.0     | 1.0               | 1.0  | 1.0           | 0.0%                  | 0.0%             |
|                                         | Test set     | 0.86          | 0.85     | 0.94        | 0.56        | 0.75    | 0.97              | 0.55 | 0.54          | 4.8%                  | 9.5%             |
| <b>Klebsiella pneumoniae (reads)</b>    | Training set | 1.0           | 1.0      | 1.0         | 1.0         | 1.0     | 1.0               | 1.0  | 1.0           | 0.0%                  | 0.0%             |
|                                         | Test set     | 0.88          | 0.88     | 0.91        | 0.78        | 0.84    | 0.99              | 0.67 | 0.67          | 7.1%                  | 4.8%             |

**Table L. Performance of random forest models (N *k*-mers = 100,000)**

| Dataset                                 |              | Mean accuracy | F1-score | Sensitivity | Specificity | AUC-ROC | Average precision | MCC  | Cohen's kappa | Very Major Error rate | Major Error rate |
|-----------------------------------------|--------------|---------------|----------|-------------|-------------|---------|-------------------|------|---------------|-----------------------|------------------|
| <b>Pseudomonas aeruginosa (contigs)</b> | Training set | 1.0           | 1.0      | 1.0         | 1.0         | 1.0     | 1.0               | 1.0  | 1.0           | 0.0%                  | 0.0%             |
|                                         | Test set     | 0.78          | 0.78     | 0.63        | 0.87        | 0.75    | 0.86              | 0.52 | 0.52          | 14.0%                 | 8.0%             |
| <b>Pseudomonas aeruginosa (reads)</b>   | Training set | 1.0           | 1.0      | 1.0         | 1.0         | 1.0     | 1.0               | 1.0  | 1.0           | 0.0%                  | 0.0%             |
|                                         | Test set     | 0.82          | 0.82     | 0.68        | 0.90        | 0.79    | 0.86              | 0.61 | 0.61          | 12.0%                 | 6.0%             |
| <b>Clostridium difficile (contigs)</b>  | Training set | 1.0           | 1.0      | 1.0         | 1.0         | 1.0     | 1.0               | 1.0  | 1.0           | 0.0%                  | 0.0%             |
|                                         | Test set     | 0.95          | 0.95     | 0.93        | 0.97        | 0.95    | 0.97              | 0.90 | 0.90          | 3.5%                  | 1.7%             |
| <b>Klebsiella pneumoniae (contigs)</b>  | Training set | 1.0           | 1.0      | 1.0         | 1.0         | 1.0     | 1.0               | 1.0  | 1.0           | 0.0%                  | 0.0%             |
|                                         | Test set     | 0.79          | 0.75     | 0.94        | 0.22        | 0.58    | 0.97              | 0.23 | 0.20          | 4.8%                  | 16.7%            |
| <b>Klebsiella pneumoniae (reads)</b>    | Training set | 1.0           | 1.0      | 1.0         | 1.0         | 1.0     | 1.0               | 1.0  | 1.0           | 0.0%                  | 0.0%             |
|                                         | Test set     | 0.86          | 0.86     | 0.91        | 0.67        | 0.79    | 0.98              | 0.58 | 0.58          | 7.1%                  | 7.1%             |

**Table M. Performance of linear regression model (N *k*-mers = 1,000)**

| <b>Dataset</b>                          |              | <b>The mean squared error</b> | <b>The coefficient of determination (<math>R^2</math>)</b> | <b>The Pearson correlation coefficient and p-value</b> | <b>The Spearman correlation coefficient and p-value</b> | <b>The <math>\pm 1</math> two-fold dilution factor accuracy</b> |
|-----------------------------------------|--------------|-------------------------------|------------------------------------------------------------|--------------------------------------------------------|---------------------------------------------------------|-----------------------------------------------------------------|
| <b>Pseudomonas aeruginosa (contigs)</b> | Training set | 2.21                          | 0.77                                                       | 0.88, 4.62E-50                                         | 0.88, 7.42E-50                                          | 0.71                                                            |
|                                         | Test set     | 5.79                          | 0.42                                                       | 0.68, 5.31E-08                                         | 0.84, 2.48E-14                                          | 0.48                                                            |
